# Supplementary material for: Anti-MRSA Sesquiterpenes from the Semi-Mangrove Plant Myoporum bontioides A. Gray
Source: PubMed Central journal article supplement (PMC6265800; doi:10.3390/md16110438), 2018-11-08
Supplement: marinedrugs-16-00438-s001.pdf [file marinedrugs-16-00438-s001.pdf]

# Supporting Materials

## Anti-MRSA Sesquiterpenes from the Semi-Mangrove Plant *Myoporum Bontioides* A. Gray

Li-Mei Dong <sup>1,†</sup>, Li-Lan Huang <sup>2,†</sup>, Hang Dai <sup>2</sup>, Qiao-Lin Xu <sup>3</sup>, Jin-Kui Ouyang <sup>1</sup>, Xu-Chao Jia <sup>4</sup>, Wen-Xiang Gu <sup>2,\*</sup> and Jian-Wen Tan <sup>1,\*</sup>

<sup>1</sup> State Key Laboratory for Conservation and Utilization of Subtropical Agro-bioresources/Guangdong Key Laboratory for Innovative Development and Utilization of Forest Plant Germplasm, College of Forestry and Landscape Architecture, South China Agricultural University, Guangzhou 510642, China; lmdong@scau.edu.cn (L.-M.D.); ouyangjack@scau.edu.cn (J.-K.O.)

<sup>2</sup> College of Materials and Energy, South China Agricultural University, Guangzhou 510642, China; lnhuang3233@163.com (L.-L.H.); hangdai0101@163.com (H.D.)

<sup>3</sup> Guangdong Provincial Key Laboratory of Bio-control for the Forest Disease and Pest, Guangdong Academy of Forestry, Guangzhou 510520, China; qlxu@sinogaf.cn

<sup>4</sup> Key Laboratory of Functional Foods, Ministry of Agriculture/Guangdong Key Laboratory of Agricultural Products Processing /Sericultural & Agri-Food Research Institute, Guangdong Academy of Agricultural Sciences, Guangzhou 510610, China; jiaxuchao@gdaas.cn (X.-C.J.)

\* Correspondence: wengxu@scau.edu.cn (W.-X.G.); jwtan@scau.edu.cn (J.-W.T.)

† These authors contributed equally to this work.

## List of Contents

**Figure S1.**  $^1\text{H}$  NMR spectrum of compound **1** in  $\text{CDCl}_3$ .

**Figure S2.**  $^{13}\text{C}$  NMR spectrum of compound **1** in  $\text{CDCl}_3$ .

**Figure S3.** HSQC spectrum of compound **1** in  $\text{CDCl}_3$ .

**Figure S4.**  $^1\text{H}$ - $^1\text{H}$  COSY spectrum of compound **1** in  $\text{CDCl}_3$ .

**Figure S5.** HMBC spectrum of compound **1** in  $\text{CDCl}_3$ .

**Figure S6.** NOESY spectrum of compound **1** in  $\text{CDCl}_3$ .

**Figure S7.** HRESIMS spectrum of compound **1**.

**Figure S8.**  $^1\text{H}$  NMR spectrum of compound **2** in  $\text{CDCl}_3$ .

**Figure S9.**  $^{13}\text{C}$  NMR spectrum of compound **2** in  $\text{CDCl}_3$ .

**Figure S10.** HSQC spectrum of compound **2** in  $\text{CDCl}_3$ .

**Figure S11.**  $^1\text{H}$ - $^1\text{H}$  COSY spectrum of compound **2** in  $\text{CDCl}_3$ .

**Figure S12.** HMBC spectrum of compound **2** in  $\text{CDCl}_3$ .

**Figure S13.** HRESIMS spectrum of compound **2**.

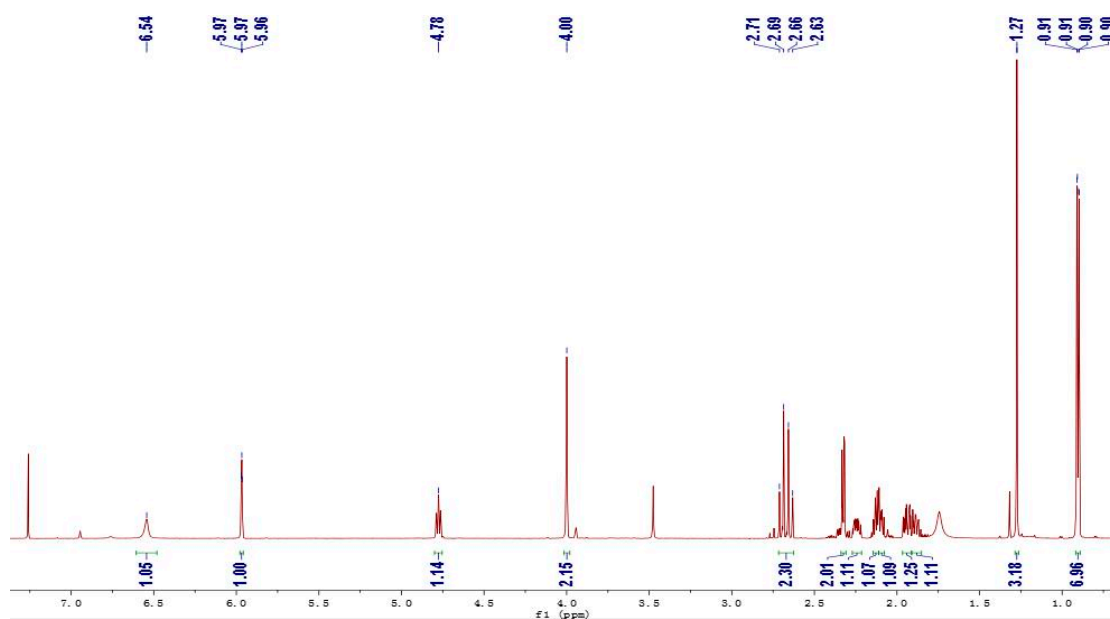

Figure S1.  $^1\text{H}$  NMR spectrum of compound **1** in  $\text{CDCl}_3$ .

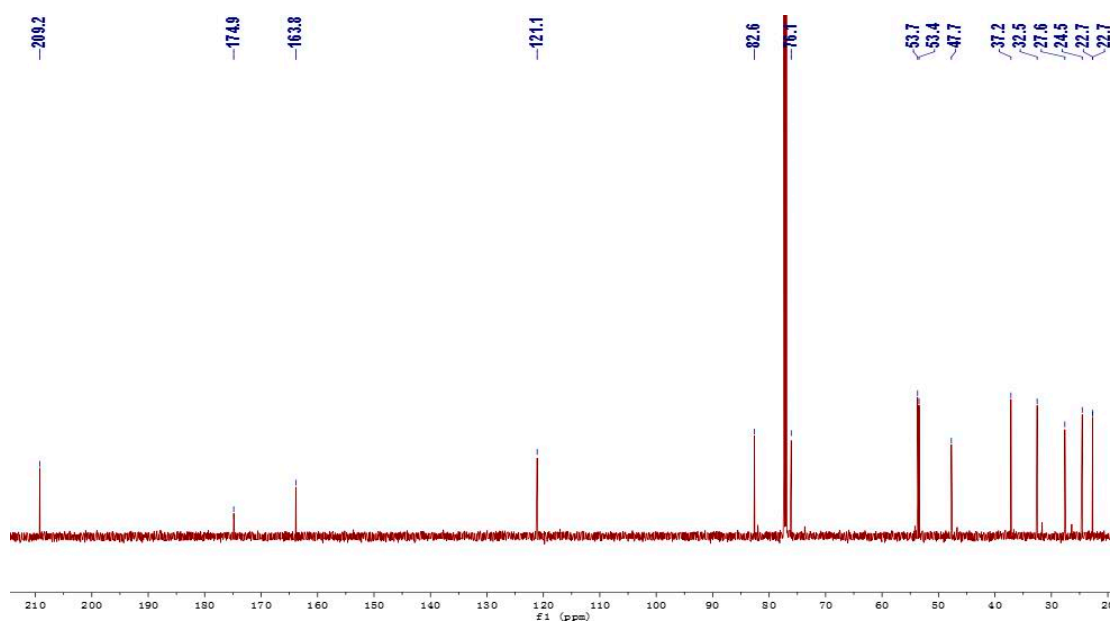

Figure S2.  $^{13}\text{C}$  NMR spectrum of compound **1** in  $\text{CDCl}_3$ .

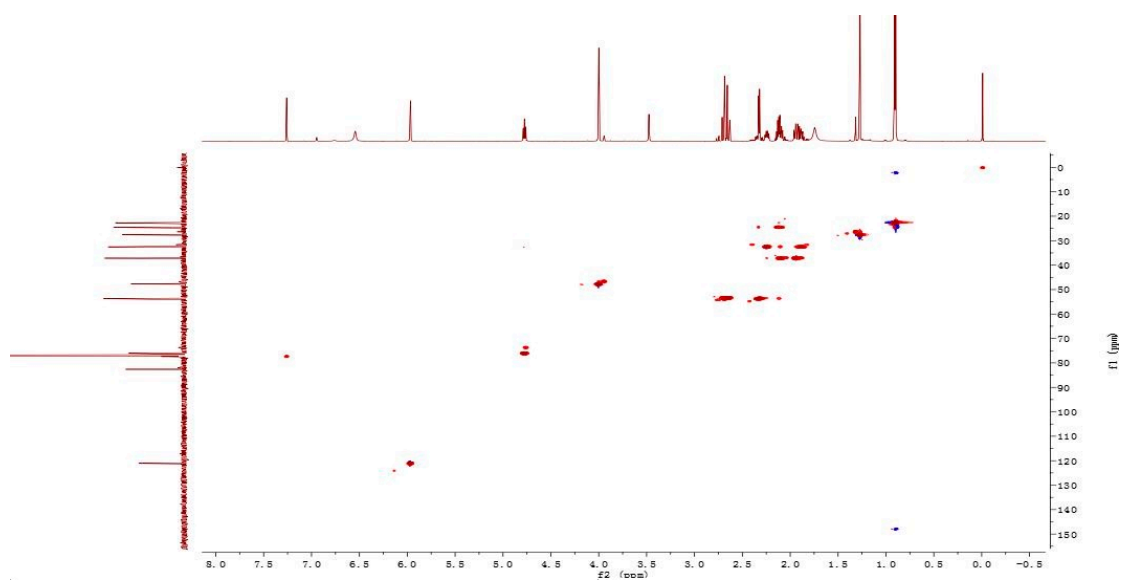

Figure S3. HSQC spectrum of compound **1** in CDCl<sub>3</sub>.

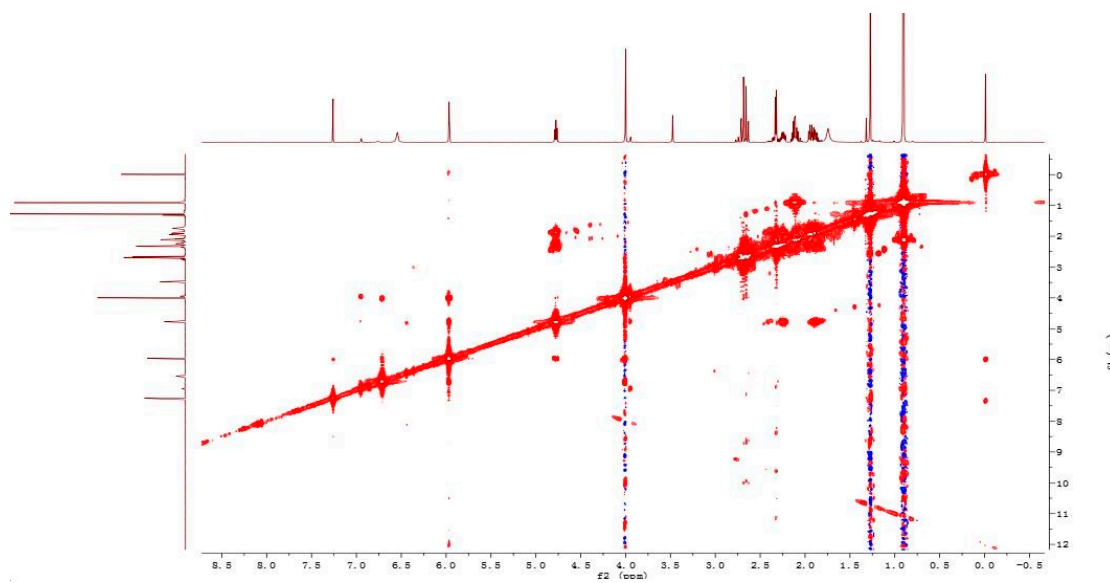

Figure S4. <sup>1</sup>H-<sup>1</sup>H COSY spectrum of compound **1** in CDCl<sub>3</sub>.

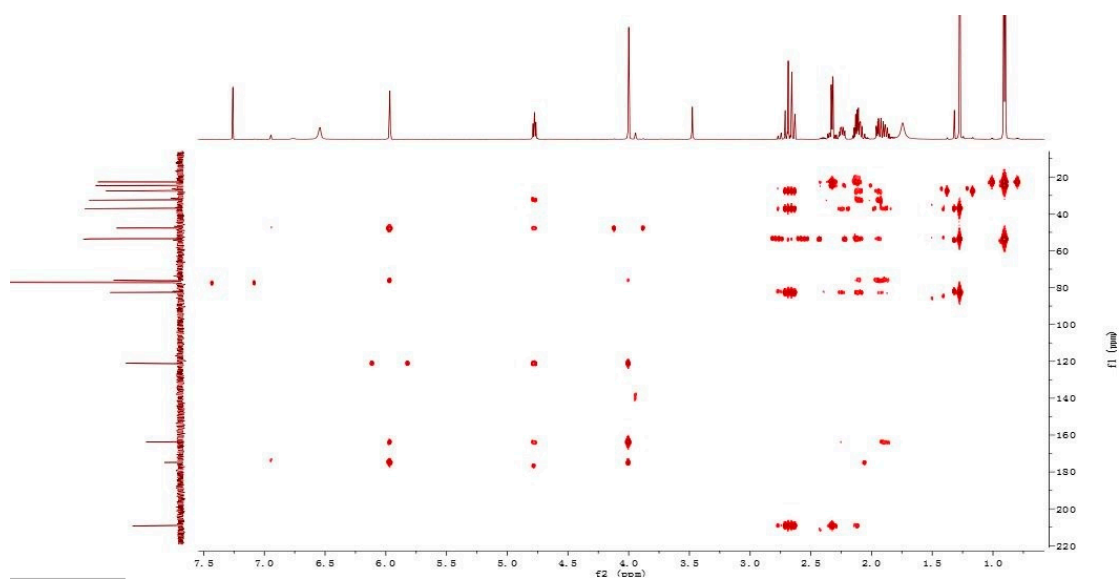

Figure S5. HMBC spectrum of compound **1** in CDCl<sub>3</sub>.

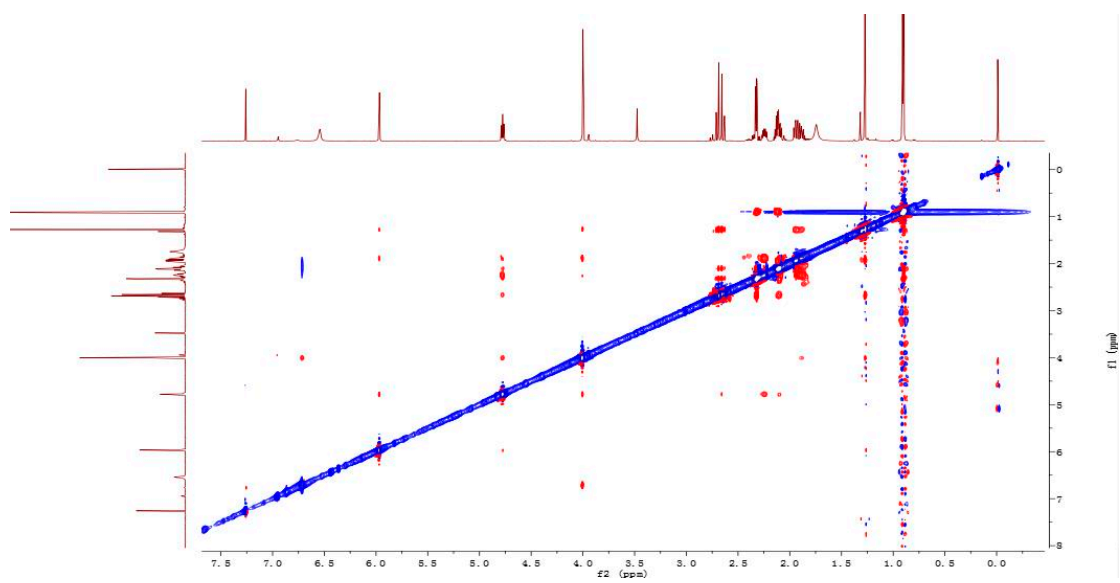

Figure S6. NOESY spectrum of compound **1** in CDCl<sub>3</sub>.

## Mass Spectrum SmartFormula Report

### Analysis Info

Analysis Name D:\Data\MS\data\MB-23\_pos.d  
Method LC\_Direct Infusion\_pos\_100-1000mz.m  
Sample Name MB-23\_pos  
Comment

Operator SCSIO  
Instrument / Ser# maxis 29

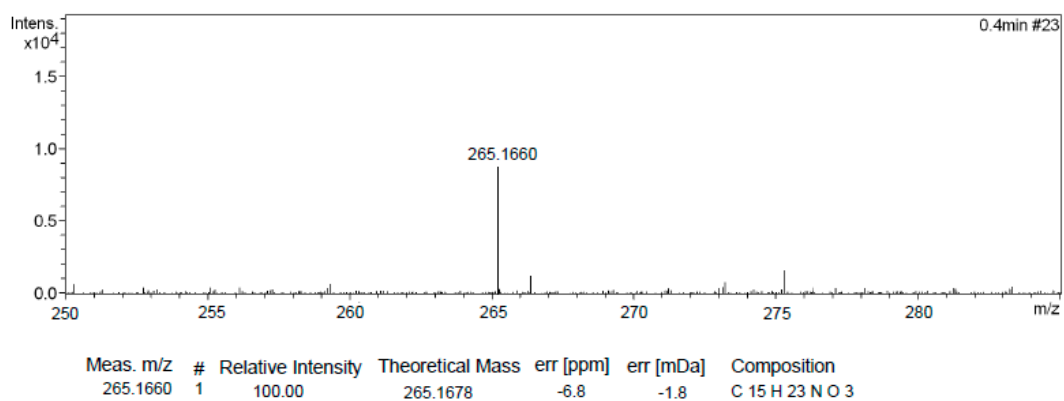

Figure S7. HRESIMS spectrum of compound 1.

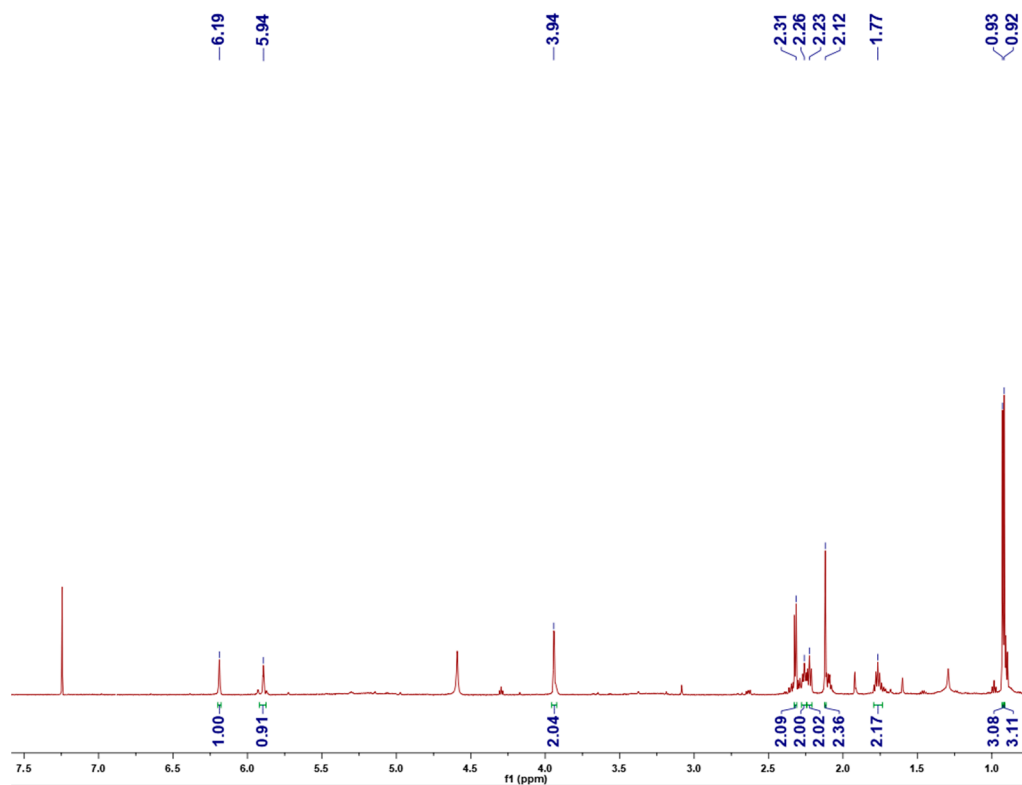

Figure S8.  $^1\text{H}$  NMR spectrum of compound 2 in  $\text{CDCl}_3$ .

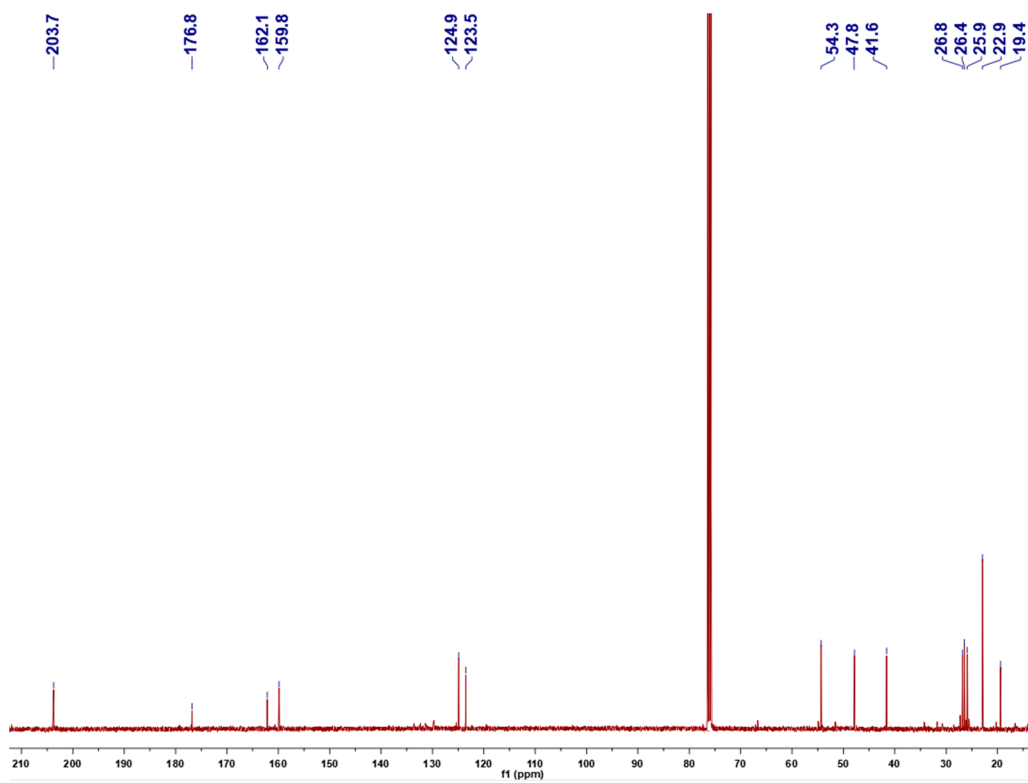

Figure S9. <sup>13</sup>C NMR spectrum of compound 2 in CDCl<sub>3</sub>.

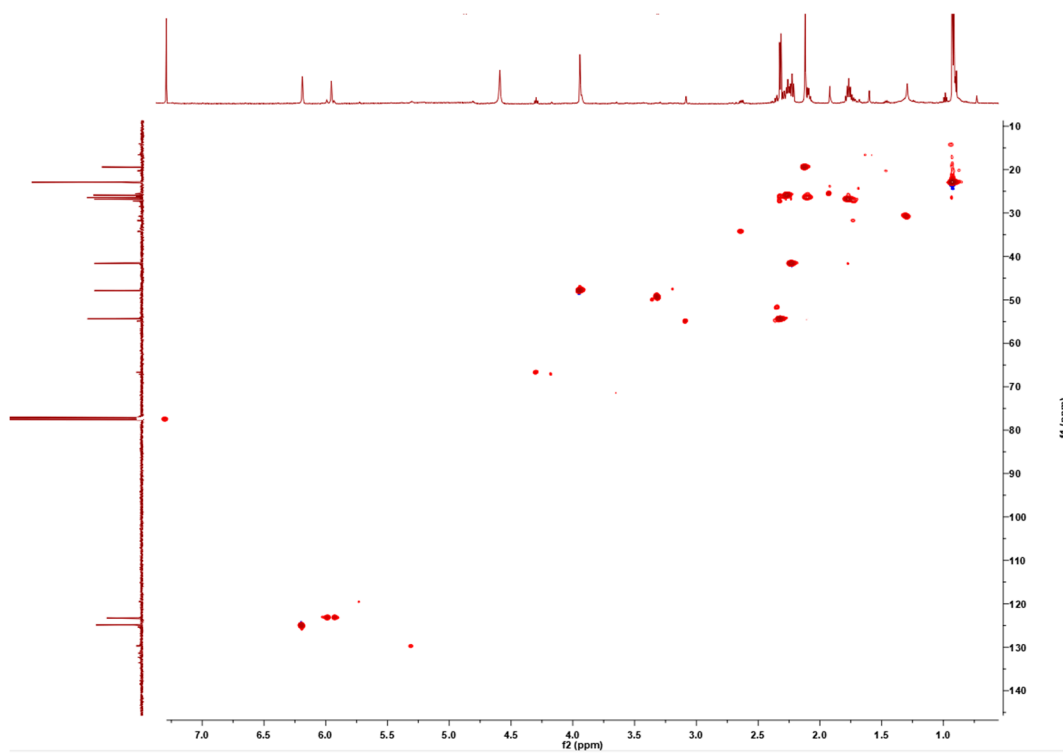

Figure S10. HSQC spectrum of compound 2 in CDCl<sub>3</sub>.

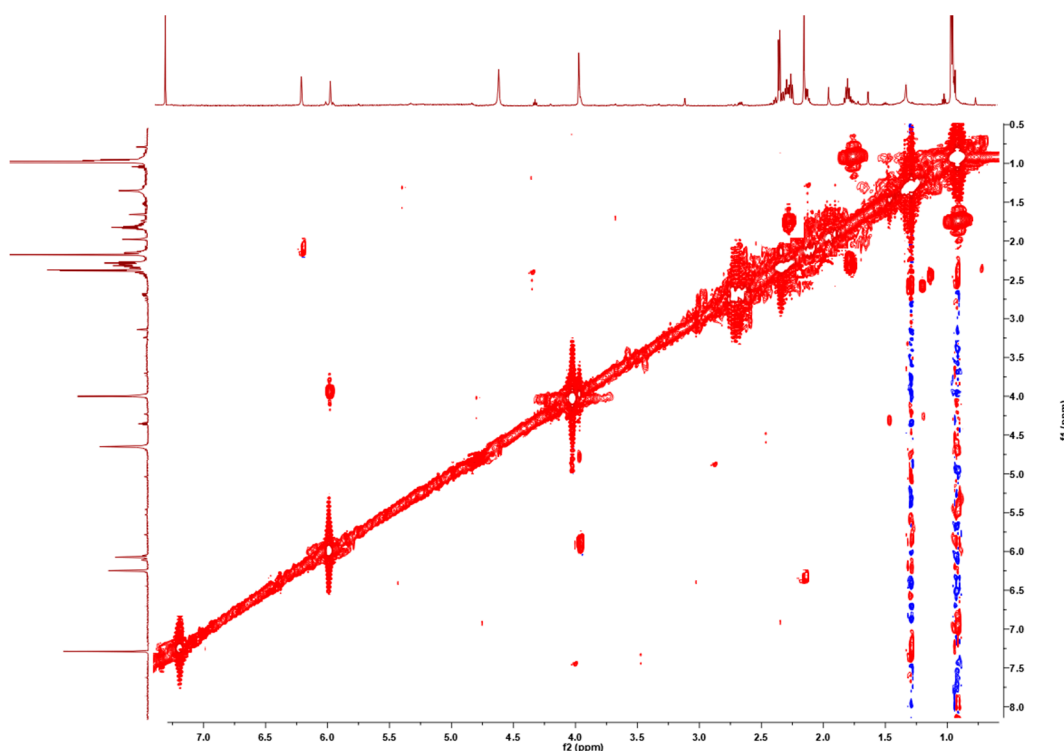

**Figure S11.**  $^1\text{H}$ - $^1\text{H}$  COSY spectrum of compound **2** in  $\text{CDCl}_3$ .

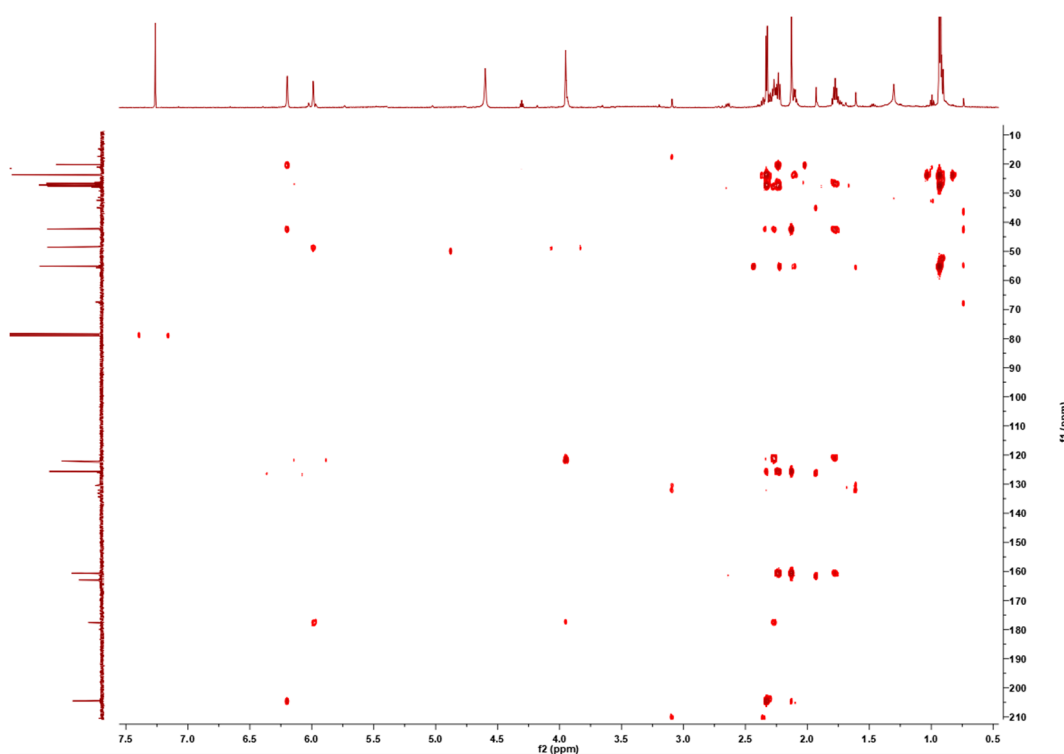

**Figure S12.** HMBC spectrum of compound **2** in  $\text{CDCl}_3$ .



## Mass Spectrum SmartFormula Report

### Analysis Info

Analysis Name D:\Data\MS\data\MB-6\_pos.d Operator SCSIO  
Method LC\_Direct Infusion\_pos\_100-1000mz.m Instrument / Ser# maXis 29  
Sample Name MB-6\_pos  
Comment

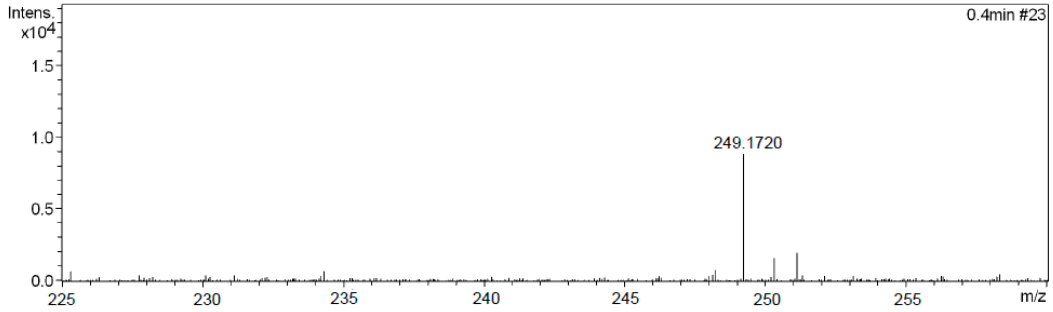

| Meas. m/z | # | Relative Intensity | Theoretical Mass | err [ppm] | err [mDa] | Composition     |
|-----------|---|--------------------|------------------|-----------|-----------|-----------------|
| 249.1720  | 1 | 100.00             | 249.1723         | -1.3      | -0.3      | C 15 H 23 N O 2 |

**Figure S13.** HRESIMS spectrum of compound 2.
